# Supplementary material
Source: Copernicus journal article supplement (doi:10.5194/tc-20-2169-2026)
Supplement: Supplementary file 1 [file tc-20-2169-2026-supplement.pdf]

Supplement of The Cryosphere, 20, 2169–2179, 2026  
<https://doi.org/10.5194/tc-20-2169-2026-supplement>  
Public domain. CC0 1.0.

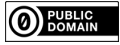

*Supplement of*

**Evaluating snow depth measurements from ground-penetrating radar and airborne lidar in boreal forest and tundra environments during the NASA SnowEx 2023 campaign**

**Kajsa Holland-Goon et al.**

*Correspondence to:* Randall Bonnell ([rbonnell@usgs.gov](mailto:rbonnell@usgs.gov)) and Daniel McGrath ([daniel.mcgrath@colostate.edu](mailto:daniel.mcgrath@colostate.edu))

The copyright of individual parts of the supplement might differ from the article licence.

45 **Supplemental Tables**

46 **Table S1: Daily snow depth accumulation measurements during the March 2023 SnowEx campaign. Measurements from**  
 47 **Farmers Loop/Creamer’s Field (FLCF) were obtained from the Creamer’s Field SNOTEL station (Site ID: 1302).**  
 48 **Measurements obtained from the Caribou/Poker Creek Research Watershed (CPCRW) and Upper Kuparuk-Toolik (UKT)**  
 49 **field sites were collected on storm interval boards. No measurements were available from the Bonanza Creek Experimental**  
 50 **Forest (BCEF). Arctic Coastal Plain (ACP) snow depth accumulation was estimated from precipitation measurements**  
 51 **(estimated snow density = 75 kg m<sup>-3</sup>) obtained from the NOAA AK Deadhorse 3 S weather station. Trace indicates**  
 52 **accumulated snow depth of <0.01 m.**

| <b>Date</b> | <b>FLCF</b> | <b>CPCRW</b>   | <b>UKT</b>     | <b>ACP</b> |
|-------------|-------------|----------------|----------------|------------|
| 8 March     | 0 m         | Trace          | 0.18 m         | 0.02 m     |
| 9 March     | 0.03 m      | 0.08 m         | 0 m            | 0 m        |
| 10 March    | 0.03 m      | 0.02 m         | 0 m            | Trace      |
| 11 March    | 0 m         | No Observation | 0.02 m         | Trace      |
| 12 March    | 0 m         | Trace          | No Observation | 0.02 m     |
| 13 March    | 0.05 m      | No Observation | 0.03 m         | 0 m        |
| 14 March    | 0 m         | No Observation | 0 m            | 0 m        |
| 15 March    | 0 m         | No Observation | 0 m            | 0 m        |

53  
 54  
 55  
 56  
 57  
 58  
 59  
 60  
 61  
 62  
 63  
 64  
 65  
 66  
 67  
 68  
 69  
 70  
 71

72 **Table S2: Boreal forest 2023 snow depth means and standard deviations (std) from GPR, excavated depth, and lidar transect profiles. Snow densities used to calculate**  
 73 **radar velocity for the GPR snow depths are also given. Airborne lidar surveys were conducted at all three sites on 11 March 2023.**

| Site     | Date     | Transect ID   | GPR System    | Bulk Snow Density (kg m <sup>-3</sup> ) | GPR Mean (m) | GPR std (m) | Excavated Mean (m) | Excavated std (m) | Lidar mean (m) | Lidar std (m) |
|----------|----------|---------------|---------------|-----------------------------------------|--------------|-------------|--------------------|-------------------|----------------|---------------|
| FLCF     | 7 March  | DN013         | 1.0 GHz 1 pol | 207                                     | 0.56         | 0.06        | 0.48               | 0.05              | 0.40           | 0.10          |
|          |          | CN069         | 1.0 GHz 1 pol | 253                                     | 0.58         | 0.05        | 0.56               | 0.05              | 0.36           | 0.05          |
|          | 8 March  | WN104         | 1.6 GHz 1 pol | 197                                     | 0.85         | 0.04        | 0.51               | 0.11              | 0.52           | 0.07          |
|          |          | DN040         | 1.6 GHz 1 pol | 218                                     | 0.74         | 0.02        | 0.42               | 0.13              | 0.49           | 0.14          |
|          | 9 March  | WB032         | 1.6 GHz 1 pol | 163                                     | 0.64         | 0.02        | 0.60               | 0.09              | 0.03           | 0.08          |
|          | 10 March | EB100         | 1.6 GHz 1 pol | 187                                     | 0.54         | 0.08        | 0.59               | 0.09              | 0.36           | 0.09          |
|          | 11 March | DN091         | 1.0 GHz 1 pol | 193                                     | 0.60         | 0.05        | 0.73               | 0.03              | 0.51           | 0.07          |
| 13 March | DB106    | 1.0 GHz 1 pol | 208           | 0.48                                    | 0.08         | 0.60        | 0.06               | 0.31              | 0.01           |               |
| BCEF     | 10 March | WB497         | 1.0 GHz 1 pol | 204                                     | 0.76         | 0.07        | 0.69               | 0.08              | 0.45           | 0.06          |
|          | 13 March | DB337         | 1.6 GHz 1 pol | 208                                     | 0.63         | 0.07        | 0.55               | 0.10              | 0.49           | 0.06          |
|          | 14 March | SA326         | 1.6 GHz 1 pol | 225                                     | 0.81         | 0.08        | 0.76               | 0.09              | 0.65           | 0.06          |
|          | 15 March | WA437         | 1.6 GHz 1 pol | 198                                     | 0.96         | 0.06        | 0.74               | 0.15              | 0.73           | 0.03          |
| CPCRW    | 8 March  | DB247         | 1.0 GHz 1 pol | 214                                     | 0.84         | 0.05        | 0.71               | 0.10              | 0.61           | 0.06          |
|          | 9 March  | DB254         | 1.0 GHz 1 pol | 207                                     | 0.80         | 0.04        | 0.80               | 0.04              | 0.41           | 0.12          |
|          | 11 March | WN281         | 1.6 GHz 1 pol | 193                                     | 0.95         | 0.07        | 0.91               | 0.13              | 0.72           | 0.03          |
|          |          | WA282         | 1.6 GHz 1 pol | 208                                     | 0.77         | 0.03        | 0.79               | 0.05              | 0.70           | 0.03          |
| 14 March | EA229    | 1.0 GHz 1 pol | 250           | 0.73                                    | 0.05         | 0.72        | 0.11               | 0.74              | 0.06           |               |

74

75 Table S3: Arctic Coastal Plain 2023 snow depth means and standard deviations (std) from GPR, excavated depth, and lidar transect profiles. Snow densities used to  
 76 calculate radar velocity for the GPR snow depths are also given. Airborne lidar survey was conducted on 10 March 2023.

| Date     | Transect ID | GPR System    | Bulk Snow Density (kg m <sup>-3</sup> ) | GPR Mean (m) | GPR std (m) | Excavated Mean (m) | Excavated std (m) | Lidar Mean (m) | Lidar std (m) |
|----------|-------------|---------------|-----------------------------------------|--------------|-------------|--------------------|-------------------|----------------|---------------|
| 11 March | A557        | 1.0 GHz 1 pol | 317                                     | 0.31         | 0.05        | 0.25               | 0.07              | 0.44           | 0.02          |
|          | N556        | 1.0 GHz 1 pol | 234                                     | 0.31         | 0.06        | 0.30               | 0.05              | 0.58           | 0.01          |
| 12 March | A500        | 1.0 GHz 1 pol | 256                                     | 0.45         | 0.10        | 0.41               | 0.09              | 0.55           | 0.07          |
|          | N501        | 1.0 GHz 1 pol | 243                                     | 0.30         | 0.03        | 0.28               | 0.02              | 0.39           | 0.04          |
|          | N502        | 1.0 GHz 1 pol | 256                                     | 0.18         | 0.05        | 0.17               | 0.05              | 0.37           | 0.02          |
| 13 March | A522        | 1.0 GHz 1 pol | 255                                     | 0.42         | 0.02        | 0.43               | 0.03              | 0.62           | 0.02          |
|          | A523        | 1.0 GHz 1 pol | 295                                     | 0.41         | 0.07        | 0.30               | 0.05              | 0.45           | 0.03          |
|          | I529        | 1.0 GHz 1 pol | 283                                     | 0.26         | 0.05        | 0.24               | 0.06              | 0.41           | 0.03          |
|          | N524        | 1.0 GHz 1 pol | 311                                     | 0.26         | 0.05        | 0.28               | 0.06              | 0.56           | 0.02          |
| 14 March | N547        | 1.0 GHz 1 pol | 276                                     | 0.30         | 0.02        | 0.20               | 0.04              | 0.42           | 0.01          |
|          | A548        | 1.0 GHz 1 pol | 255                                     | 0.32         | 0.06        | 0.34               | 0.05              | 0.52           | 0.03          |
|          | I549        | 1.0 GHz 1 pol | 359                                     | 0.40         | 0.04        | 0.39               | 0.04              | 0.50           | 0.05          |
|          | N546        | 1.0 GHz 1 pol | 247                                     | 0.37         | 0.10        | 0.32               | 0.09              | 0.56           | 0.03          |

77  
 78  
 79  
 80  
 81

82 Table S4: Upper Kuparuk-Toolik 2023 snow depth means and standard deviations (std) from GPR, excavated depth, and lidar transect profiles. Snow densities used to  
 83 calculate radar velocity for the GPR snow depths are also given. Airborne lidar survey was conducted on 13 March 2023.

| Date     | Transect ID | GPR System    | Bulk Snow Density (kg m <sup>-3</sup> ) | GPR Mean (m) | GPR std (m) | Excavated Mean (m) | Excavated std (m) | Lidar Mean (m) | Lidar std (m) |
|----------|-------------|---------------|-----------------------------------------|--------------|-------------|--------------------|-------------------|----------------|---------------|
| 8 March  | N659        | 1.0 GHz 1 pol | 291                                     | 0.46         | 0.02        | 0.49               | 0.06              | 0.61           | 0.01          |
| 9 March  | A784        | 1.0 GHz 2 pol | 225                                     | 0.45         | 0.05        | 0.38               | 0.05              | 0.47           | 0.03          |
|          | N787        | 1.0 GHz 2 pol | 238                                     | 0.70         | 0.27        | 0.80               | 0.17              | 0.76           | 0.11          |
|          | N789        | 1.0 GHz 2 pol | 274                                     | 0.53         | 0.10        | 0.57               | 0.14              | 0.57           | 0.06          |
|          | N786        | 1.0 GHz 1 pol | 231                                     | 0.72         | 0.06        | 0.56               | 0.10              | 0.69           | 0.08          |
|          | N788        | 1.0 GHz 1 pol | 250                                     | 0.92         | 0.06        | 0.64               | 0.04              | 0.81           | 0.05          |
|          | N790        | 1.0 GHz 1 pol | 291                                     | 0.38         | 0.07        | 0.42               | 0.07              | 0.42           | 0.03          |
| 10 March | A766        | 1.0 GHz 2 pol | 220                                     | 0.46         | 0.08        | 0.49               | 0.07              | 0.30           | 0.07          |
|          | N762        | 1.0 GHz 2 pol | 225                                     | 0.39         | 0.05        | 0.41               | 0.04              | 0.31           | 0.06          |
|          | N760        | 1.0 GHz 2 pol | 226                                     | 0.54         | 0.09        | 0.54               | 0.06              | 0.39           | 0.03          |
|          | A759        | 1.0 GHz 1 pol | 229                                     | 0.42         | 0.10        | 0.44               | 0.09              | 0.39           | 0.04          |
| 11 March | N730        | 1.0 GHz 2 pol | 214                                     | 0.39         | 0.04        | 0.47               | 0.03              | 0.29           | 0.08          |
|          | A739        | 1.0 GHz 2 pol | 233                                     | 0.40         | 0.03        | 0.40               | 0.04              | 0.26           | 0.03          |
| 15 March | D698        | 1.0 GHz 2 pol | 229                                     | 0.39         | 0.04        | 0.42               | 0.08              | 0.48           | 0.08          |

85 **Data Availability**

86 GPR, lidar, and snow pit data are archived with the NSIDC DAAC (Bonnell et al., 2025; Larsen, 2024; Mason et al.,  
87 2024; Meehan and Rowland, 2024; Webb, 2024). Creamer’s Field SNOTEL data are available at  
88 <https://wcc.sc.egov.usda.gov/nwcc/site?sitenum=1302>. NOAA AK Deadhorse 3 S weather station data are available  
89 at <https://www.ncei.noaa.gov/access/crn/sensors.htm?stationId=1793>.

90

91 Any use of trade, firm, or product names is for descriptive purposes only and does not imply endorsement by the U.S.  
92 Government.

93 **References**

94 Bonnell, R., McGrath, D., Detre, A., and Holland-Goon, K.: SnowEx23 Mar23 IOP CSU 1 GHz Ground Penetrating  
95 Radar Raw, Version 1 [data set], NASA National Snow and Ice Data Center Distributed Active Archive Center,  
96 <https://doi.org/10.5067/3X5Q3X7Y87U3>, 2025.

97 Larsen, C.: SnowEx23 Airborne Lidar-Derived 0.25M Snow Depth and Canopy Height, Version 1 [data set], NASA  
98 National Snow and Ice Data Center Distributed Active Archive Center, <https://doi.org/10.5067/BV4D8RRU1H7U>,  
99 2024.

100 Mason, M., Vuyovich, C. M., Stuefer, S., Elder, K., Vas, D., Marshall, H., and Durand, M.: SnowEx23 Mar23 Snow  
101 Pit Measurements, Version 1 [data set], NASA National Snow and Ice Data Center Distributed Active Archive Center,  
102 <https://doi.org/413819/SJZ90KNPKCYR>, 2024.

103 Meehan, T. G. and Rowland, T.: SnowEx23 CRREL Ground Penetrating Radar, Version 1 [data set], NASA National  
104 Snow and Ice Data Center Distributed Active Archive Center, <https://doi.org/10.5067/TSU0U7L4X2UW>, 2024.

105 Webb, R.: SnowEx23 University of Wyoming Ground Penetrating Radar, Version 1 [data set]. NASA National Snow  
106 and Ice Data Center Distributed Active Archive Center, <https://doi.org/10.5067/H3D9IT1W6JT6>, 2024.

107
